# Supplementary material for: Boosting the voltage/capacity stability of O2-type Li-rich layered cathodes by tailoring transition metal distribution for Li-ion batteries
Source: Royal Society of Chemistry journal article supplement (doi:10.1039/d3qi01275a), 2023-01-01
Supplement: d3qi01275a1.pdf [file d3qi01275a1.pdf]

## Supporting Information for

Boosting the voltage/capacity stability of O<sub>2</sub>-type Li-rich layered cathodes by tailoring transition metal distribution for Li-ion batteries

Peiyu Hou, Zhenbo Sun, Mohan Dong, Maosheng Gong, Feng Li\*, Xijin Xu\*

School of Physics and Technology, University of Jinan, Jinan, 250022, China

\*Corresponding authors

E-mail address: sps\_lifeng@ujn.edu.cn (F. Li); sps\_xuxj@ujn.edu.cn (X. Xu)

## 1. Experimental

### 1.1 Synthesis of precursors

The graded precursor with the tailored TM distribution was prepared by a modified co-precipitation reaction in Figure S1. The stoichiometric  $\text{NiSO}_4 \cdot 6\text{H}_2\text{O}$  (157.68 g),  $\text{CoSO}_4 \cdot 7\text{H}_2\text{O}$  (56.2 g), and  $\text{MnSO}_4 \cdot \text{H}_2\text{O}$  (202.8 g) (Ni–Co–Mn=3/1/6) were added into deionized (DI) water (tank 2) and form aqueous solution (2L). The stoichiometric  $\text{NiSO}_4 \cdot 6\text{H}_2\text{O}$  (52.56 g),  $\text{CoSO}_4 \cdot 7\text{H}_2\text{O}$  (56.2 g), and  $\text{MnSO}_4 \cdot \text{H}_2\text{O}$  (152.1 g) (Ni–Co–Mn=1/1/8) were added into deionized (DI) water (tank 1) and form aqueous solution (2L). At the beginning of co-precipitation, the Ni-rich solution (tank 2) was injected into Ni-poor solution (tank 1) at  $100 \text{ mL h}^{-1}$ . Meanwhile, the solution (tank 1) with ceaselessly tailored TM content was injected into the reactor at  $200 \text{ mL h}^{-1}$ . The aqueous alkali containing 2M  $\text{Na}_2\text{CO}_3$  and 0.2M ammonia was employed to automatically control the constant pH value (8.1). After about 20 h, both solutions were completely consumed, and the aimed precursors with tailored TM distribution were prepared. The bulk  $[\text{Ni}_{0.2}\text{Co}_{0.1}\text{Mn}_{0.7}]\text{CO}_3$  precursors were also synthesized.

### 1.2 Synthesis of O2-type LLOs

The above precursors with stoichiometric  $\text{Li}_2\text{CO}_3$  and  $\text{Na}_2\text{CO}_3$  (Na/TM=5/6 and Li/TM=1/5) were calcined at  $800 \text{ }^\circ\text{C}$  (10 h) to prepare the graded and bulk P2-type  $\text{Na}_{5/6}\text{Li}_{1/5}[\text{Ni}_{0.2}\text{Co}_{0.1}\text{Mn}_{0.7}]_{4/5}\text{O}_2$ . The formed P2-type oxides was calcined ( $300 \text{ }^\circ\text{C}$ , 2 h) to cause the Na/Li cation exchange in the binary molten salt ( $\text{LiNO}_3/\text{LiCl}$  of 88:12 w./w.%). After the ion exchange, the mixture was washed and dried in a vacuum. Finally, the graded and bulk O2-type LLOs were achieved.

### 1.3 Materials characterization

The morphology was measured by scanning electron microscope (SEM, VEGA3). The material phase was studied by X-ray diffraction (XRD, SmartLab, Rigaku). The microstructure was studied by

transmission electron microscopy (TEM, FEI titan themis 200). The content of Mn<sup>2+</sup> dissolution and molar ratio of TM was measured by inductively coupled plasmas (ICP-OES, Agilent 5100). The elemental valence state was studied by X-ray photoelectron spectroscopy (XPS, Thermo Escalab 250).

#### 1.4 Electrochemical measurements

The manufacturing process of electrode can refer to our previous reports.<sup>1,2</sup> The material loading of the cathode is 2.5–3.0 mg cm<sup>-2</sup>. The performance of graded and bulk O2-type LLOs was measured by 2032-type coin cells. Lithium foil with a diameter of 14 mm was used as the anode electrode. The electrolyte consisted of 1M LiPF<sub>6</sub> dissolved in the solvents of DMC and EC (0.7/0.3 by volume). The electrochemistry and cyclic voltammetry (CV) were tested by LAND instrument (CT-2001A, Wuhan Land) and electrochemical workstation (CHI660e, Shanghai Chenhua), respectively. The potential range of 2.0–4.8 V (vs. Li/Li<sup>+</sup>) was selected while the current density of 1C was 300 mA g<sup>-1</sup>. Galvanostatic intermittent titration technique (GITT) was conducted at 0.3C for 600s along with a relaxation time of 3600s. All electrochemical analysis were investigated at 25 °C.

#### References

- [1] F. Li, Y. Zhao, L. Xia, Z. Yang, J. Wei and Z. Zhou, Well-dispersed Na<sub>3</sub>V<sub>2</sub>(PO<sub>4</sub>)<sub>2</sub>F<sub>3</sub>@rGO with improved kinetics for high-power sodium-ion batteries, *J. Mater. Chem. A*, 2020, **8**, 12391–12397.
- [2] P. Hou, L. Zhang and X. Gao, A high-energy, full concentration-gradient cathode material with excellent cycle and thermal stability for lithium ion batteries, *J. Mater. Chem. A*, 2014, **2**, 17130–17138.

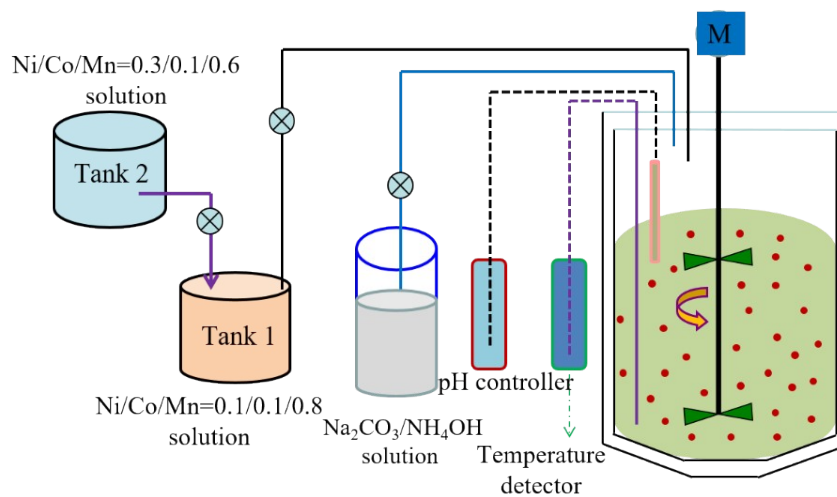

Figure S1 Scheme of synthesis of compositionally graded precursors *via* a carbonate co-precipitation route.

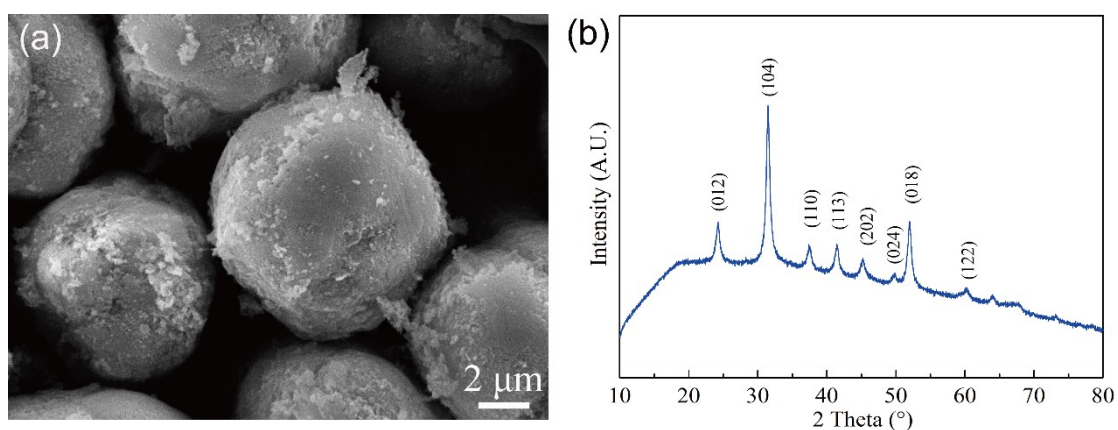

Figure S2 (a) SEM image and (b) XRD pattern of the as-prepared compositionally graded precursors by co-precipitation reactions.

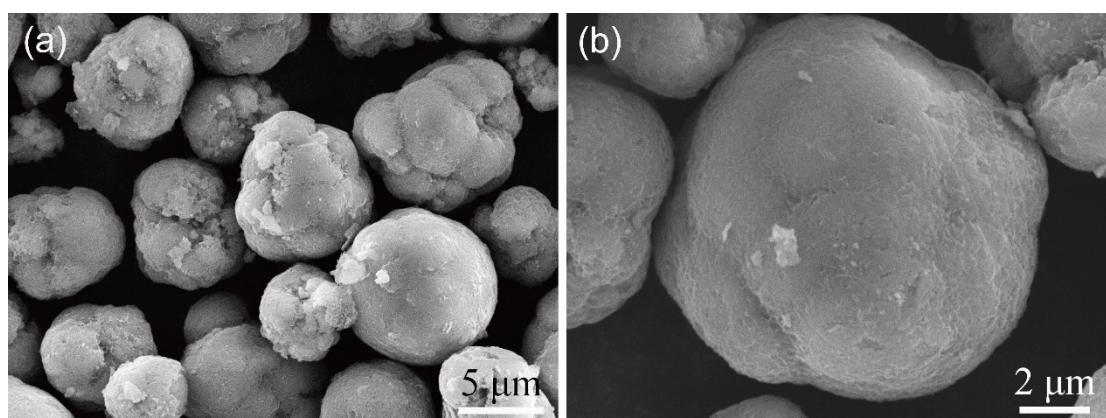

Figure S3 (a,b) SEM images of the as-prepared bulk precursors by co-precipitation reactions.

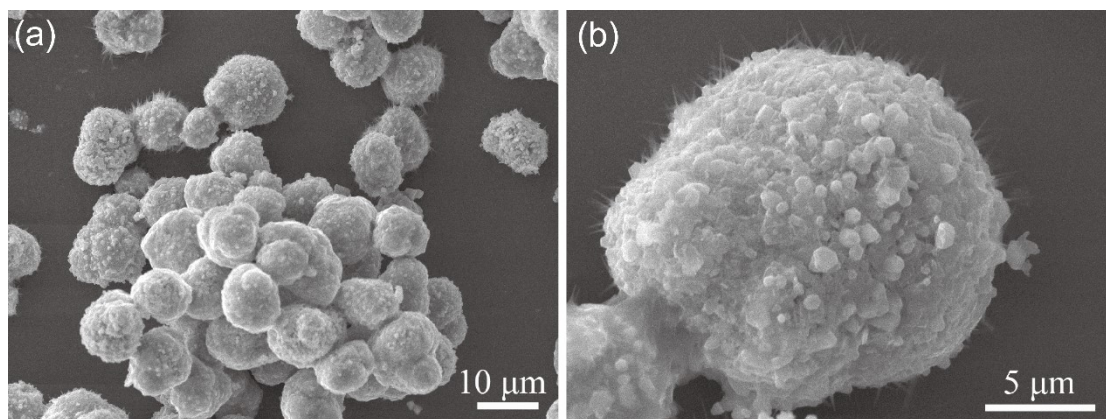

Figure S4 (a,b) SEM images of the bulk P2-type oxide  $\text{Na}_{5/6}\text{Li}_{1/5}[\text{Ni}_{0.2}\text{Co}_{0.1}\text{Mn}_{0.7}]\text{O}_2$  calcined the mixture of precursors with stoichiometric  $\text{Li}_2\text{CO}_3$  and  $\text{Na}_2\text{CO}_3$  at  $800^\circ\text{C}$ .

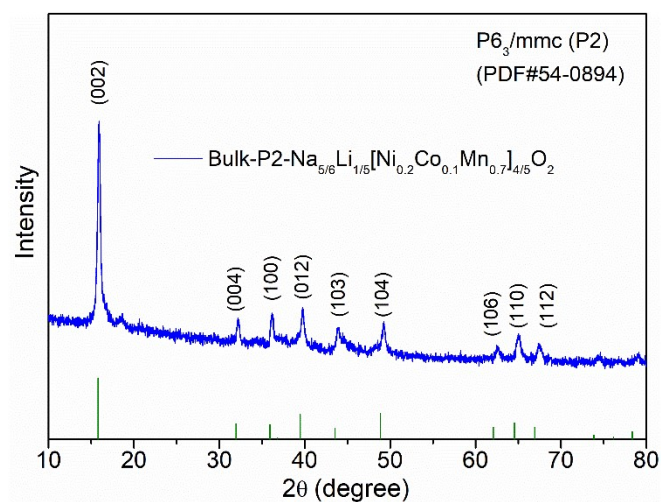

Figure S5 XRD of the bulk P2-type oxide  $\text{Na}_{5/6}\text{Li}_{1/5}[\text{Ni}_{0.2}\text{Co}_{0.1}\text{Mn}_{0.7}]\text{O}_2$  calcined the mixture of precursors with stoichiometric  $\text{Li}_2\text{CO}_3$  and  $\text{Na}_2\text{CO}_3$  at  $800^\circ\text{C}$ .

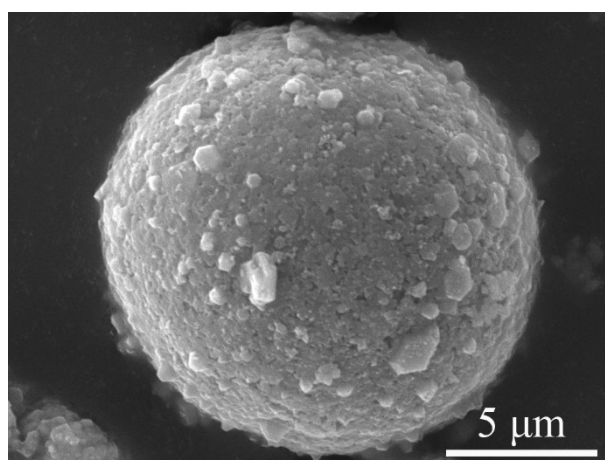

Figure S6 SEM image of the bulk O2-type oxide after Na/Li ion exchange.

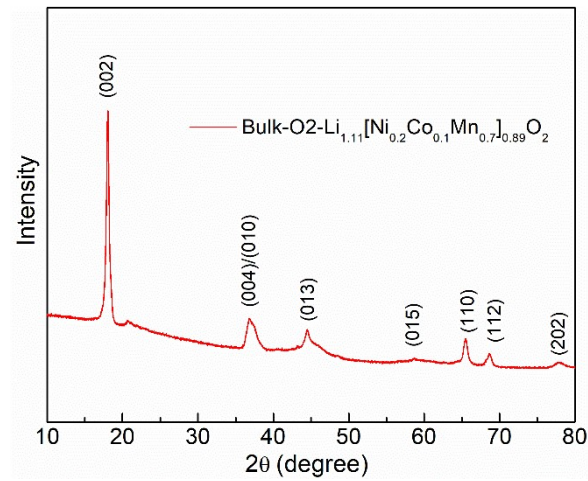

Figure S7 XRD of the bulk O2-type oxide after Na/Li ion exchange.

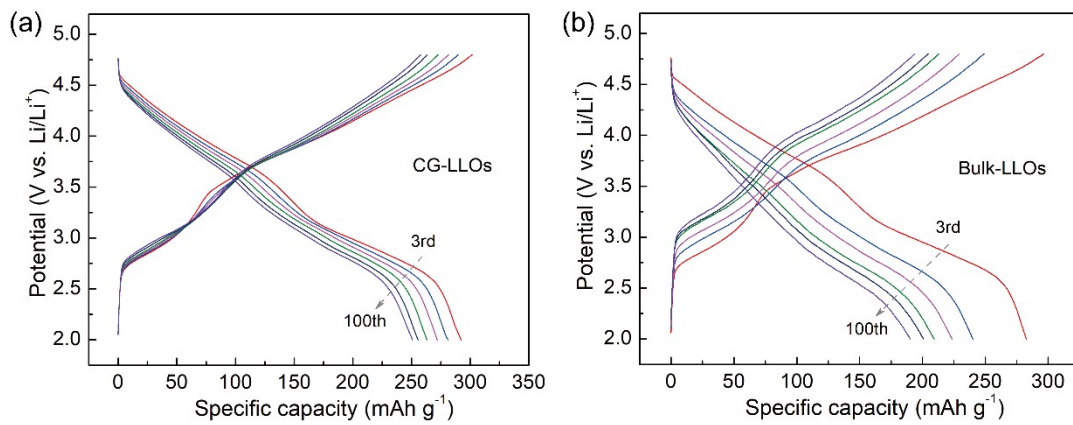

Figure S8 The continuous charge/discharge curves from 3<sup>rd</sup> to 100<sup>th</sup> cycles of (a) CG-LLOs and (b) bulk-LLOs.

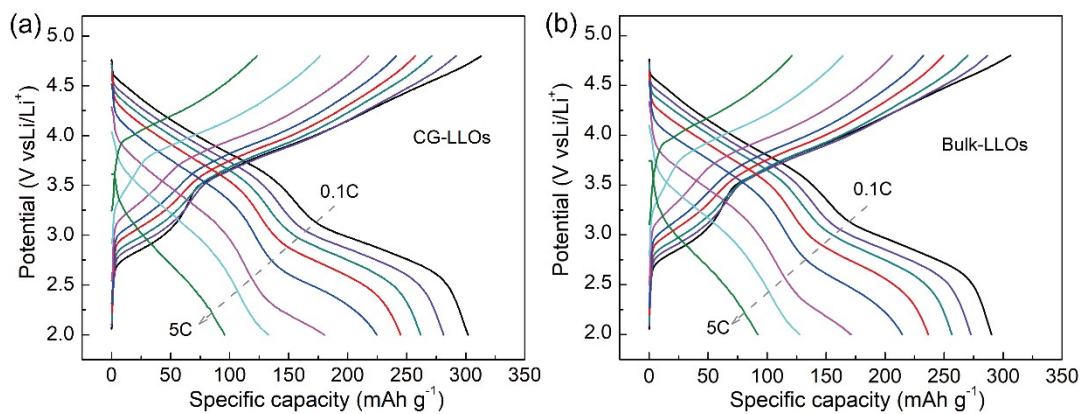

Figure S9 The charge/discharge profiles at varied rates for (a) CG-LLOs and (b) bulk-LLOs.



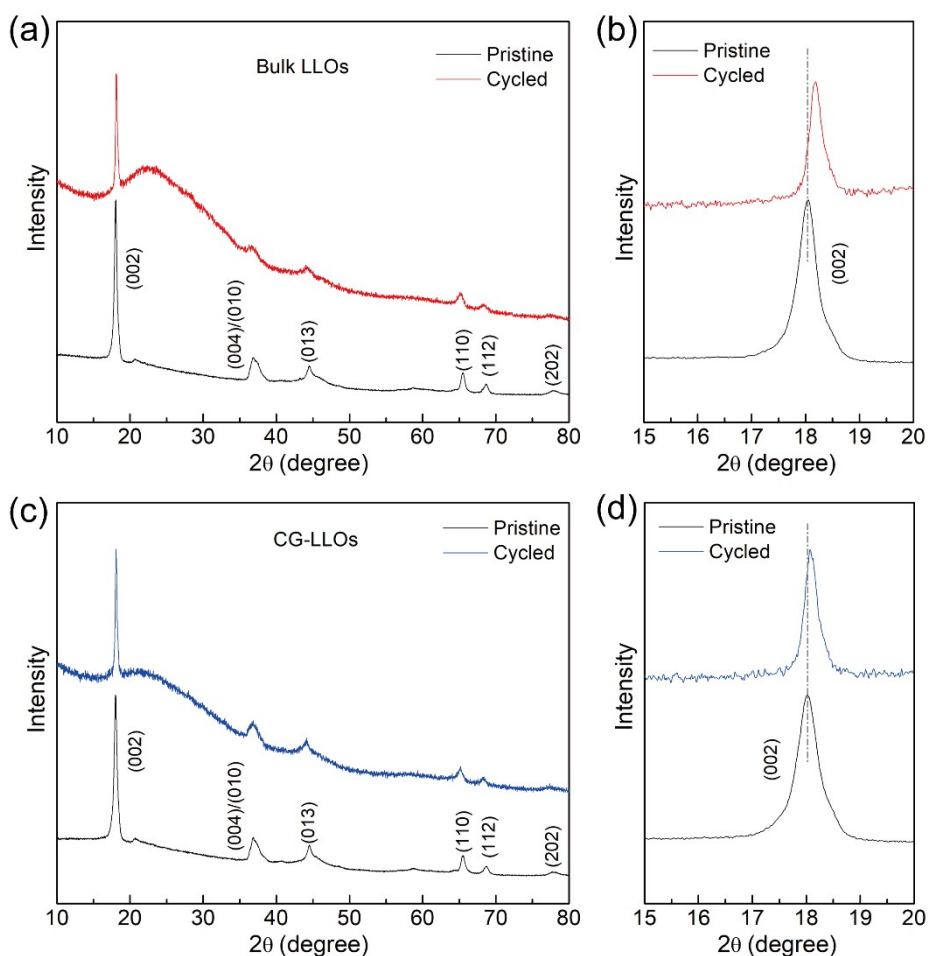

Figure S10 (a,c) XRD patterns of pristine and cycled CG-LLO and bulk-LLO electrodes, and (b,d) the enlarged region between 15 and 20 degree. The cycled electrodes measured at discharge state after 100 cycles.

Table S1 The comparison of the electrochemical performance between this work and these reported O2-type cathodes.

| Structural formula                                                                                                | Modified method                               | Capacity (mAh g <sup>-1</sup> ) | Cycling stability (%)  | Ref       |
|-------------------------------------------------------------------------------------------------------------------|-----------------------------------------------|---------------------------------|------------------------|-----------|
| Li <sub>1.12</sub> [Ni <sub>0.18</sub> Co <sub>0.09</sub> Mn <sub>0.61</sub> ]O <sub>2</sub>                      | Graded structure                              | 300 (0.1C)                      | 86.7 (100 cycles@0.1C) | This work |
| Na <sub>0.007</sub> Li <sub>1.17</sub> Ni <sub>0.27</sub> Mn <sub>0.73</sub> O <sub>2+x</sub>                     | -                                             | 278 (0.1C)                      | 82.0 (100 cycles@1C)   | 1         |
| Na <sub>0.003</sub> Li <sub>1.14</sub> Ni <sub>0.26</sub> Mn <sub>0.74</sub> O <sub>2+x</sub>                     | -                                             | 224 (0.1C)                      | 79.0 (100 cycles@1C)   | 1         |
| Li <sub>0.78</sub> [Li <sub>0.24</sub> Mn <sub>0.76</sub> ]O <sub>2</sub>                                         | Nanowires                                     | 275 (0.1C)                      | 81.1 (100 cycles@1C)   | 2         |
| Li <sub>1.2</sub> Mn <sub>0.54</sub> Ni <sub>0.13</sub> Co <sub>0.13</sub> O <sub>2+δ-x</sub> F <sub>x</sub>      | F doping                                      | 280 (0.1C)                      | 94.4 (100 cycles@1C)   | 3         |
| Li <sub>1.2</sub> Ni <sub>0.13</sub> Co <sub>0.13</sub> Mn <sub>0.54</sub> O <sub>2</sub>                         | All-fluorinated electrolyte                   | 278 (2/3C)                      | 83.3 (100 cycles@2/3C) | 4         |
| Li <sub>0.9</sub> [Li <sub>0.3</sub> Mn <sub>0.7</sub> ]O <sub>2</sub>                                            | O2/O3 biphasic                                | 220 (0.1C)                      | 90.5 (100 cycles@0.1C) | 5         |
| Li <sub>1.091</sub> Na <sub>0.01</sub> Mn <sub>0.506</sub> Co <sub>0.214</sub> Ni <sub>0.122</sub> O <sub>2</sub> | O2/O3 hybrid                                  | 279 (0.1C)                      | 77.8 (100 cycles@0.5C) | 6         |
| Li <sub>1.25</sub> Co <sub>0.25</sub> Mn <sub>0.50</sub> O <sub>2</sub>                                           | Single-layer Li <sub>2</sub> MnO <sub>3</sub> | 400 (0.1C)                      | 90 (50 cycles@0.2C)    | 7         |
| Li <sub>0.83</sub> Li <sub>0.2</sub> Ni <sub>0.08</sub> Mn <sub>0.58</sub> Co <sub>0.14</sub> O <sub>2</sub>      | -                                             | 258 (0.1C)                      | 76.9 (50 cycles@0.1C)  | 8         |
| Li <sub>1.033</sub> Ni <sub>0.2</sub> [ $\bullet$ <sub>0.1</sub> Mn <sub>0.5</sub> ]O <sub>2</sub>                | Native vacancies                              | 228 (0.1C)                      | 102.3 (50 cycles@0.1C) | 9         |
| Li <sub>1.033</sub> Ni <sub>0.2</sub> Mn <sub>0.6</sub> O <sub>2</sub>                                            | -                                             | 186 (0.1C)                      | 75.8 (50 cycles@0.1C)  | 9         |
| Li <sub>x</sub> [Li <sub>1/4</sub> Mn <sub>3/4</sub> ]O <sub>2</sub>                                              | -                                             | 224 (0.1C)                      | 74.3 (50 cycles@0.1C)  | 10        |

|                                                                             |   |             |                       |    |
|-----------------------------------------------------------------------------|---|-------------|-----------------------|----|
| $\text{Li}_{0.83}(\text{Li}_{0.2}\text{Ni}_{0.2}\text{Mn}_{0.6})\text{O}_2$ | - | 235 (0.05C) | 82.5 (40cycles@0.05C) | 11 |
|-----------------------------------------------------------------------------|---|-------------|-----------------------|----|

Table 2 The simulated results from EIS measurement of the bulk-LLOs and CG-LLOs at discharge state under varied cycles.

| Samples   | States | Simulated electrochemical parameters |                       |                       |                    |
|-----------|--------|--------------------------------------|-----------------------|-----------------------|--------------------|
|           |        | $R_s$ ( $\Omega$ )                   | $R_{sf}$ ( $\Omega$ ) | $R_{ct}$ ( $\Omega$ ) | $W_o$ ( $\Omega$ ) |
| Bulk-LLOs | 1st    | 2.11                                 | 441.8                 | 131.7                 | 578                |
|           | 100th  | 2.76                                 | 819.1                 | 608.3                 | 1678               |
| CG-LLOs   | 1st    | 2.26                                 | 513.3                 | 135.7                 | 884                |
|           | 100th  | 2.43                                 | 639.7                 | 221.6                 | 1036               |

## REFERENCES

- [1] J. Feng, Y.S. Jiang, F. Yu, W. Ke, L. Que, J.G. Duh, Z.B. Wang, Understanding Li roles in chemical reversibility of O2-type Li-rich layered cathode materials, *J. Energy Chem.*, 2022, 66, 666-675.
- [2] H. Shang, Y. Zuo, F. Shen, J. Song, F. Ning, K. Zhang, L. He, D. Xia, O2-Type  $\text{Li}_{0.78}[\text{Li}_{0.24}\text{Mn}_{0.76}]\text{O}_2$  Nanowires for High-Performance Lithium-Ion Battery Cathode, *Nano lett.*, 2020, 20, 5779-5785.
- [3] S. Cao, C. Wu, X. Xie, H. Li, Z. Zang, Z. Li, G. Chen, X. Guo, X. Wang, Suppressing the Voltage Decay Based on a Distinct Stacking Sequence of Oxygen Atoms for Li-Rich Cathode Materials, *ACS Appl. Mater. Interfaces*, 2021, 13, 17639-17648.
- [4] C. Cui, X. Fan, X. Zhou, J. Chen, Q. Wang, L. Ma, C. Yang, E. Hu, X.Q. Yang, C. Wang, Structure and Interface Design Enable Stable Li-Rich Cathode, *J. Am. Chem. Soc.*, 2020, 142, 8918-8927.
- [5] X. Cao, J. Sun, Z. Chang, P. Wang, X. Yue, J. Okagaki, P. He, E. Yoo, H. Zhou, Enabling Long-Term Cycling Stability Within Layered Li-Rich Cathode Materials by O2/O3-Type Biphasic Design Strategy, *Adv. Funct. Mater.*, 2022, 32, 2205199.
- [6] Y. Chen, Y. Liu, J. Zhang, H. Zhu, Y. Ren, W. Wang, Q. Zhang, Y. Zhang, Q. Yuan, G.X. Chen, L.C. Gallington, K. Li, X. Liu, J. Wu, Q. Liu, Y. Chen, Constructing O2/O3 homogeneous hybrid stabilizes Li-rich layered cathodes, *Energy Storage Mater.*, 2022, 51, 756-763.
- [7] Y. Zuo, B. Li, N. Jiang, W. Chu, H. Zhang, R. Zou, D. Xia, A High-Capacity O2-Type Li-Rich Cathode Material with a Single-Layer  $\text{Li}_2\text{MnO}_3$  Superstructure, *Adv. Mater.*, 2018, 30, 1707255.
- [8] Z. Wang, Y. Wang, D. Meng, Q. Zheng, Y. Zhang, F. Cai, D. Zhu, J. Liu, Y. He, L. Chen, Z.F. Ma, L. Li, High-Capacity O2-Type Layered Oxide Cathode Materials for Lithium-Ion Batteries: Ion-Exchange Synthesis and Electrochemistry, *J. Electrochem. Soc.*, 2022, 169, 020508.
- [9] H. Liu, C. Li, W. Tong, B. Hu, Highly Reversible Local Structural Transformation Enabled by Native Vacancies



in O2-Type Li-Rich Layered Oxides with Anion Redox Activity, *J. Phys. Chem. Lett.*, 2023, *14*, 2323-2330.

[10] N. Yabuuchi, R. Hara, M. Kajiyama, K. Kubota, T. Ishigaki, A. Hoshikawa, S. Komaba, New O2/P2-type Li-Excess Layered Manganese Oxides as Promising Multi-Functional Electrode Materials for Rechargeable Li/Na Batteries, *Adv. Energy Mater.*, 2014, 1301453.

[11] D. Eum, B. Kim, S. J. Kim, H. Park, J. Wu, S.-P. Cho, G. Yoon, M. H. Lee, S.-K. Jung, W. Yang, W. M. Seong, K. Ku, O. Tamwattana, S. K. Park, I. Hwang and K. Kang, Voltage decay and redox asymmetry mitigation by reversible cation migration in lithium-rich layered oxide electrodes, *Nat. Mater.*, 2020, *19*, 419-427.
